# Supplementary material for: Maternal Protein Restriction Modulates Angiogenesis and AQP9 Expression Leading to a Delay in Postnatal Epididymal Development in Rat
Source: MDPI journal article supplement (doi:10.3390/cells8091094), 2019-09-17
Supplement: s1 [file s1]

## Supplementary

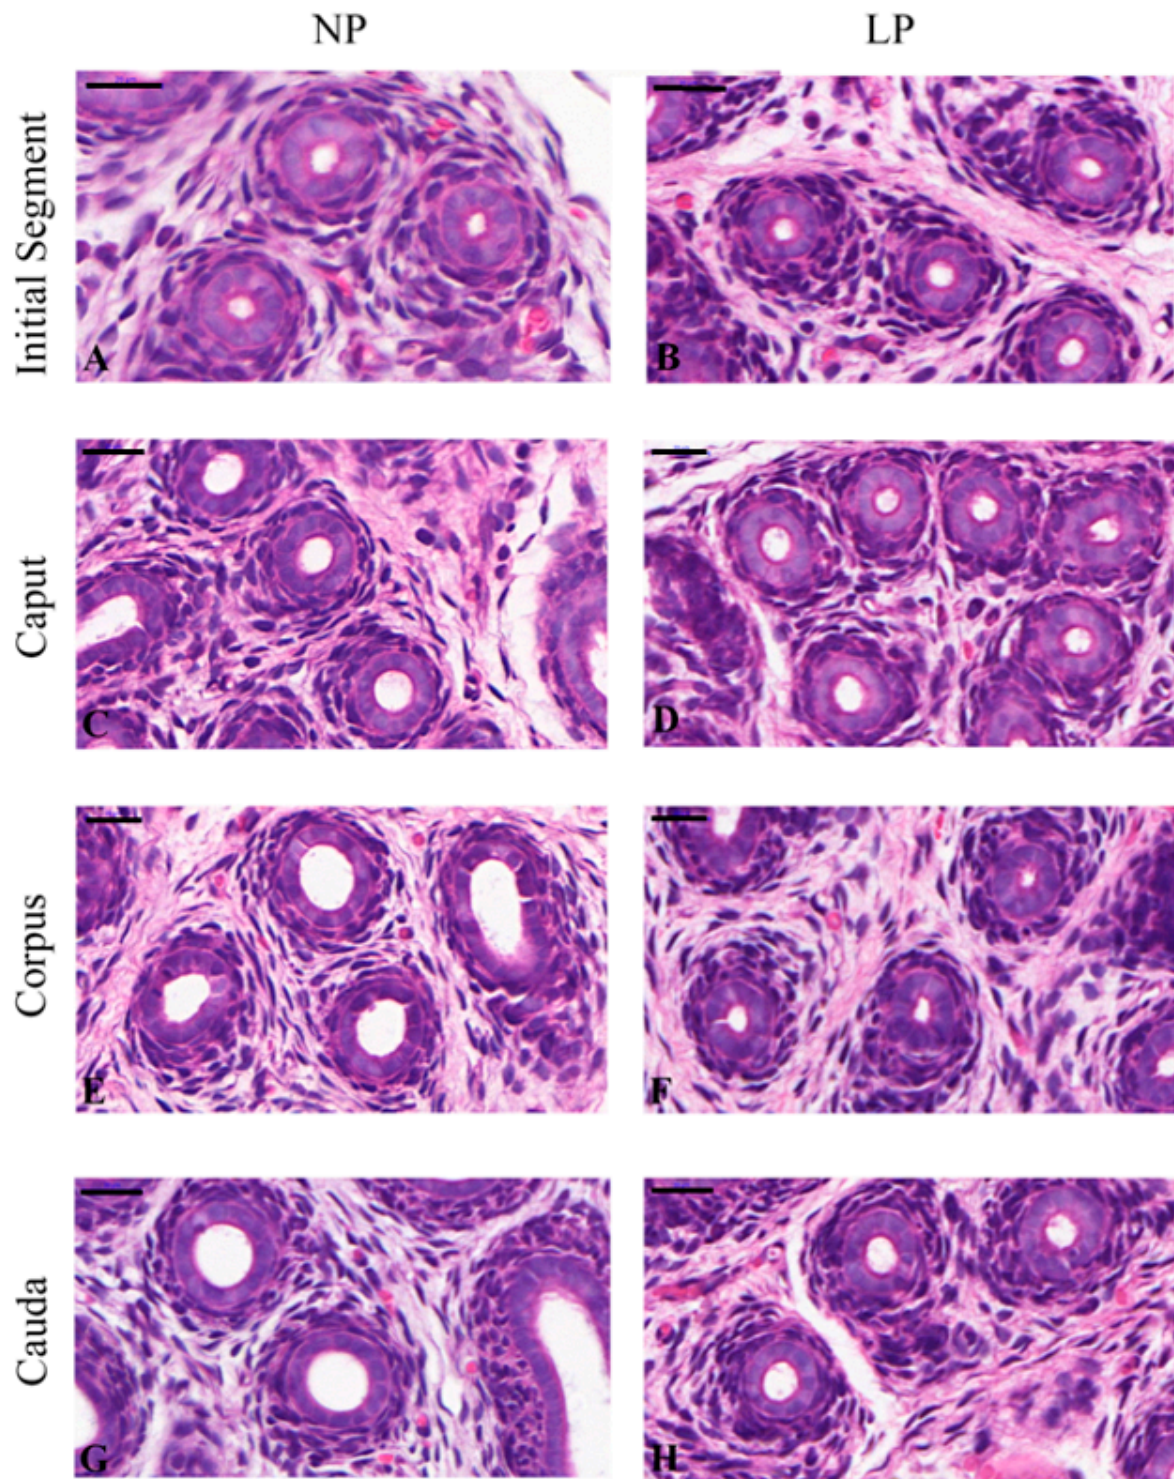

**Figure S1.** Epididymis sections of the initial segment, caput, corpus and cauda from the NP and LP animals at PND7, stained with hematoxylin-eosin. NP = normoprotein animals; LP = low-protein animals. Scale bar = 20  $\mu$ m.



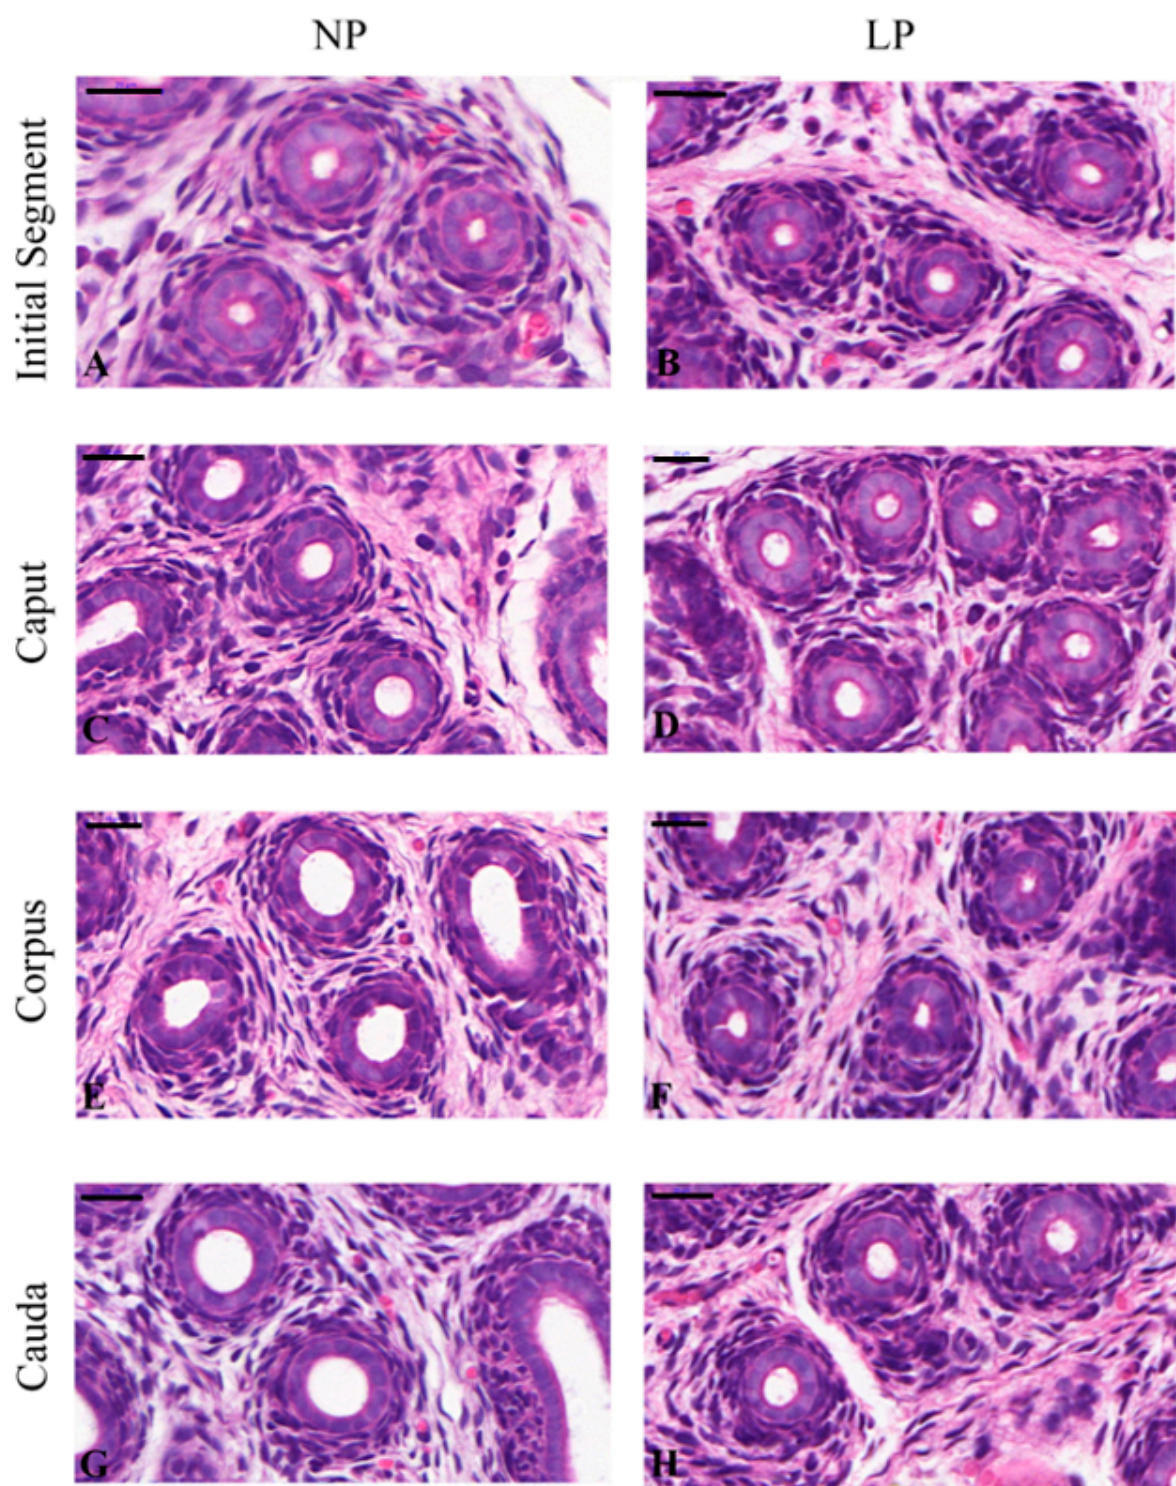

**Figure S2.** Epididymis sections of the initial segment, caput, corpus and cauda from the NP and LP animals at PND14, stained with hematoxylin-eosin. NP = nor moproprotein animals; LP = low-protein animals. Scale bar = 20  $\mu$ m.
